# Supplementary material
Source: PubMed Central journal article supplement (PMC6168914)

### **Supplemental Figure Legend**

Individual rat resting-state rCBV (normalized to baseline) immediately after MCA occlusion within the ischemic-side S1-barrel field cortex, plotted according to presence or absence of ischemic damage (i.e., infarction and/or selective neuronal loss) at post-mortem (n=6 in each subset). There was a highly significant difference in normalized rCBV between the two subsets ( $p < 0.001$ , two-sample t-test), with no overlap of individual values relative to an apparent normalized rCBV threshold ~50%.

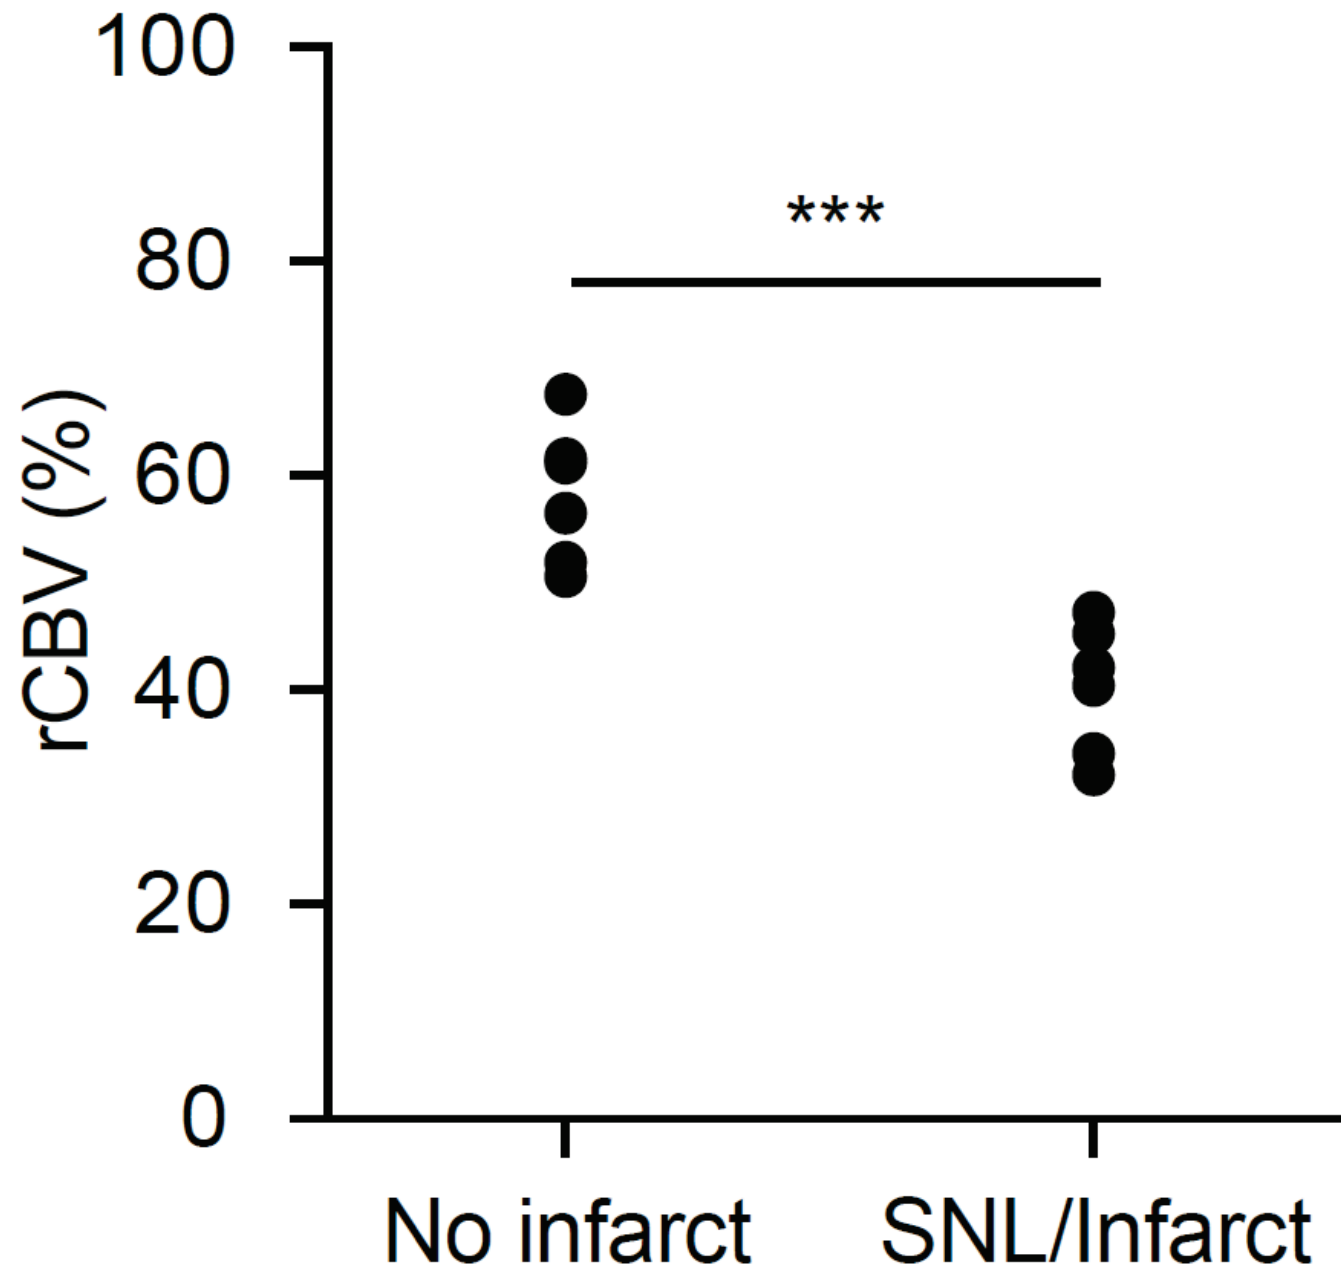

Supplement: Supplemental_material1.pdf [file Supplemental_material1.pdf]
